# Supplementary material for: Cholesterol Oxidase Binds TLR2 and Modulates Functional Responses of Human Macrophages
Source: PubMed Central journal article supplement (PMC4121183; doi:10.1155/2014/498395), 2014-07-08
Supplement: 498395.f1.pdf [file 498395.f1.pdf]

**A**

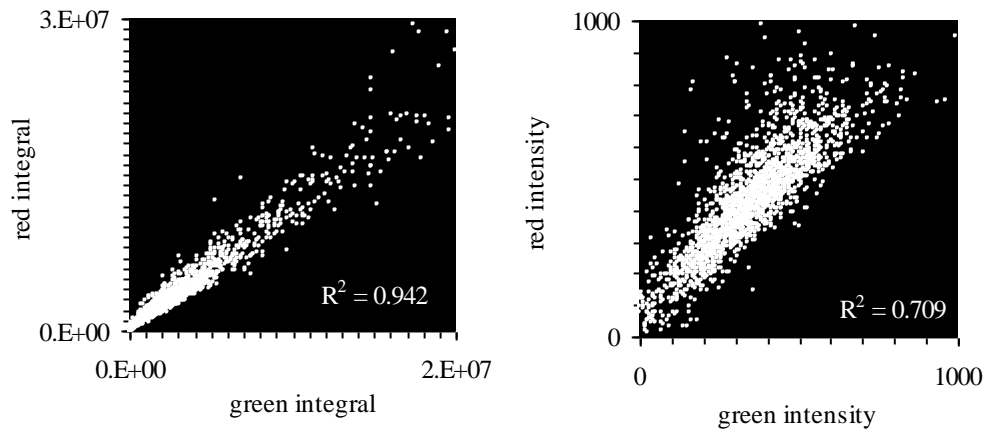

**B**

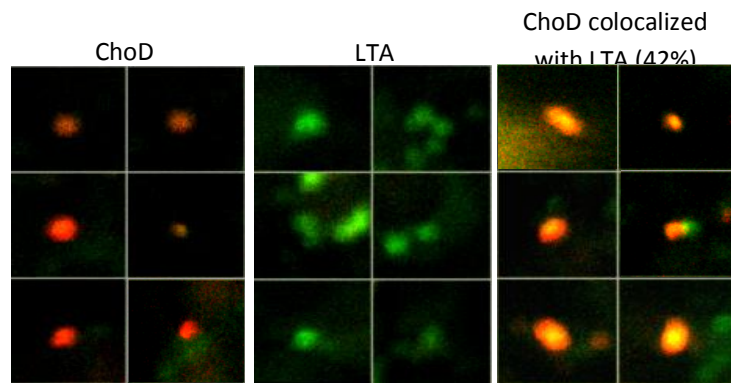

Figure S1
